# Supplementary material
Source: Springer Nature journal article supplement (https://www.springermedizin.de/resource/supplementary/13045_2013_322_MOESM2_ESM.pdf/9661106)
Supplement: MOESM2 [file 9661106]

## A. Overall Survival according to periods of time

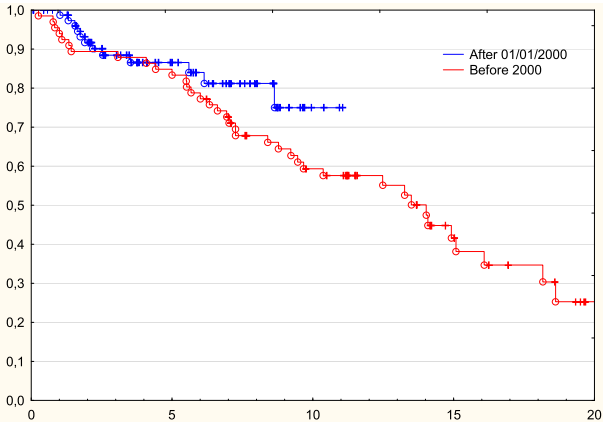

## B. Progression Free Survival according to periods of time of time

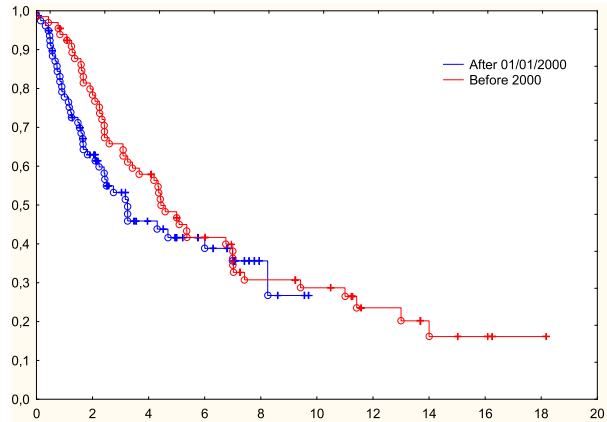

2 periods: < 2000 and > or = 2000
